# Supplementary material for: Cell wall composition and lignin biosynthetic gene expression along a developmental gradient in an Australian sugarcane cultivar
Source: PubMed Central journal article supplement (PMC5721908; doi:10.7717/peerj.4141), 2017-12-05
Supplement: peerj-05-4141-s002.pdf [file peerj-05-4141-s002.pdf]

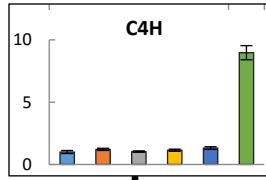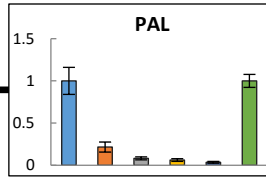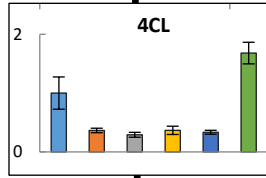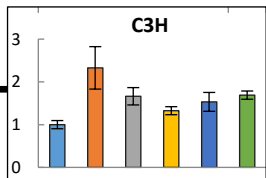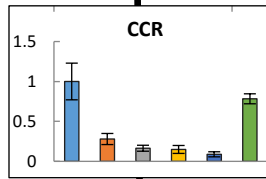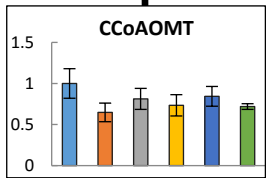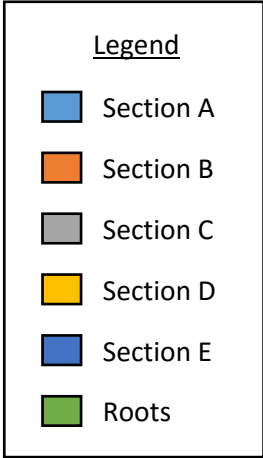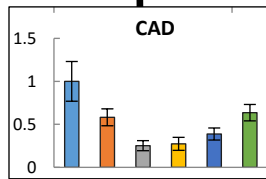

**H monomer**

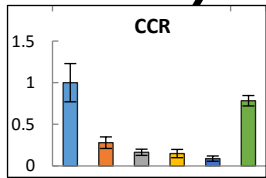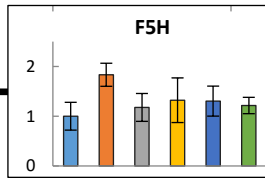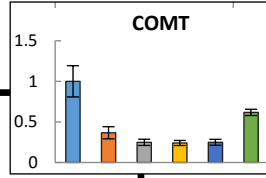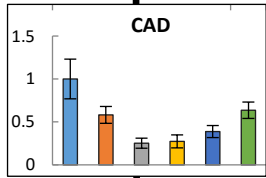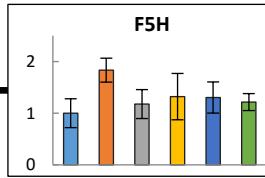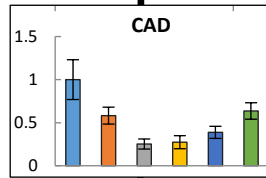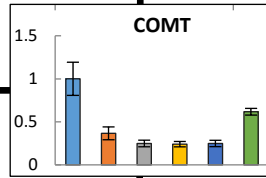

**G monomer**

**S monomer**
